# Supplementary material
Source: Springer Nature journal article supplement (https://www.springermedizin.de/resource/supplementary/12943_2012_1098_MOESM3_ESM.pdf/9552480)

**A**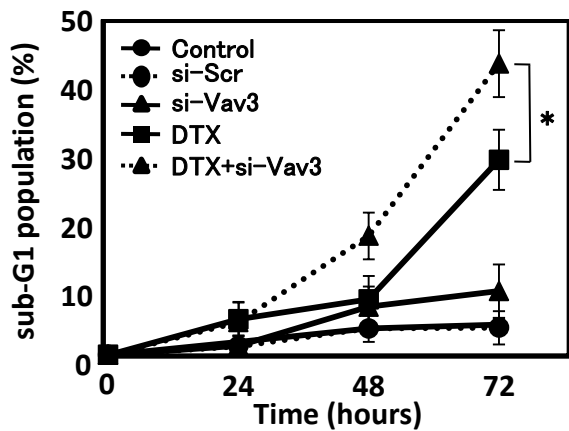**B**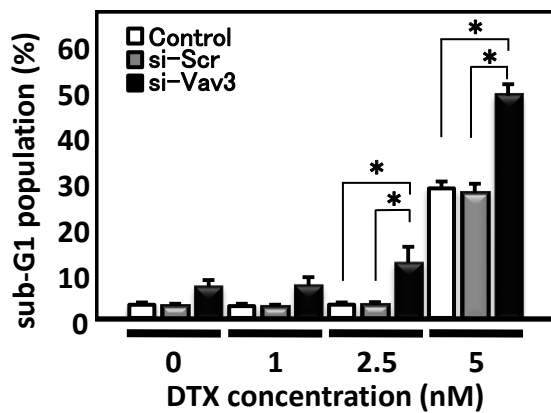**C**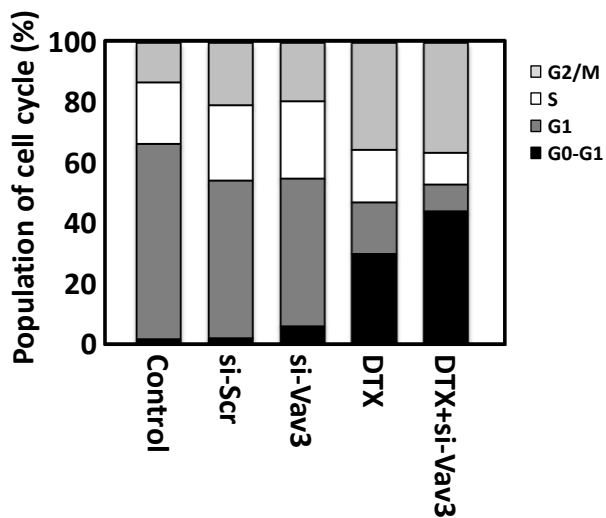**D**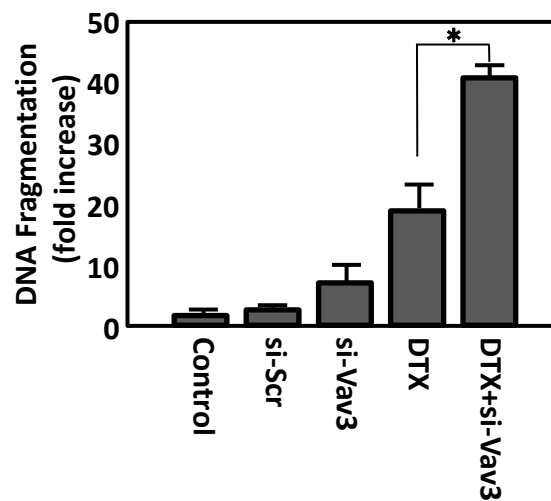**E**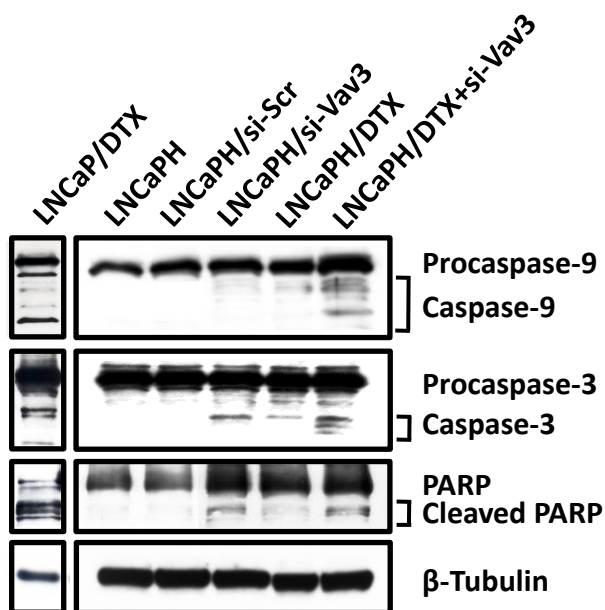**F**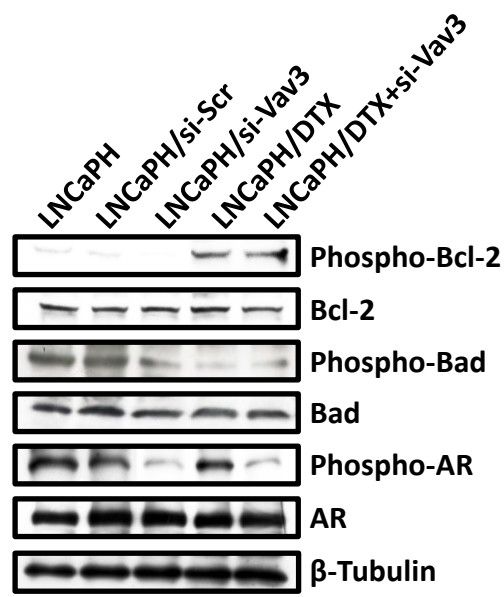

Supplement: MOESM3 [file 9552480]
